# Supplementary material for: Serological evidence of hepatitis A, B, and C virus infection in older adults in Khon Kaen, Thailand and the estimated rates of chronic hepatitis B and C virus infection in Thais, 2017
Source: PeerJ. 2019 Aug 19;7:e7492. doi: 10.7717/peerj.7492 (PMC6705384; doi:10.7717/peerj.7492)
Supplement: Supplemental Information 1 [file peerj-07-7492-s002.doc]

Firstname……………………………………………Last name………………………………………..

Gender  Male  FemaleAge……………..yearDate of birth..…DD...…**/**…MM.…**/**…YY…

Have you ever received Hepatitis A vaccine  No  Yes

Have you ever received Hepatitis B vaccine  No  Yes

Do you have the chronic disease such as

Chronic hepatitis  No  Yes

Diabetes mellitus  No  Yes

Hypertensive heart disease  No  Yes

Heart disease  No  Yes

*** This information will be keptanonymous and use for research only***
